# Gene-culture co-inheritance of a behavioral trait

Elliot G. Aguilar<sup>1</sup> and Erol Akçay<sup>2</sup>

Department of Biology, University of Pennsylvania

433 S University Ave. Philadelphia, PA 19104

August 11, 2016

<sup>1</sup> [elliot.g.aguilar@gmail.com](mailto:elliot.g.aguilar@gmail.com)

<sup>2</sup> [eakcay@sas.upenn.edu](mailto:eakcay@sas.upenn.edu)

## Abstract

Human behavioral traits are complex phenotypes that result from both genetic and cultural transmission. But different inheritance systems need not favor the same phenotypic outcome. What happens when there are conflicting selection forces in the two domains? To address this question, we derive a Price equation that incorporates both cultural and genetic inheritance of a phenotype where the effects of genes and culture are additive. We then use this equation to investigate whether a genetically maladaptive phenotype can evolve under dual transmission. We examine the special case of altruism using an illustrative model, and show that cultural selection can overcome genetic selection when the variance in culture is sufficiently high with respect to genes. Finally, we show how our basic result can be extended to nonadditive effects models. We discuss the implications of our results for understanding the evolution of maladaptive behaviors.

## 1 Introduction

Behavioral traits are complex phenotypes that result from the interaction between genes and environment (Turkheimer, 2000). In species with social learning, a significant component of what has traditionally been called the environment may be cultural transmission. While behavioral genetics seeks to find the genetic basis of increasingly complex behavioral phenotypes, such as educational attainment or political participation (Ward et al., 2014; Fowler et al., 2008), a true understanding of the evolution of behavioral traits means reckoning with how genetic and cultural transmission interact to affect evolutionary outcomes.

When there are multiple domains of inheritance, the concept of fitness must be tailored to each domain. Nearly forty years ago, Richerson & Boyd (1978) pointed

12 out that optimum value of a phenotype that maximizes genetic fitness may differ  
 13 from the value that maximizes cultural fitness, leading to conflicts between the two  
 14 inheritance systems. In the ensuing decades, evolutionary theorists have studied  
 15 numerous cases of the co-evolution of genetic and cultural traits (Boyd and Richer-  
 16 son, 1988; Cavalli-Sforza and Feldman, 1981), such as genetically encoded learn-  
 17 ing rules and culturally acquired helping behaviors (Boyd et al., 2003; Guzmán  
 18 et al., 2007; Lehmann et al., 2008). By contrast, the problem of conflict between  
 19 inheritance systems that affect the same trait has received far less attention. This  
 20 is curious, given the likelihood that many human behaviors are both genetically  
 21 and culturally determined. For instance, fertility itself may result from genetic pre-  
 22 dispositions towards fitness maximization and culturally acquired preferences for  
 23 family size (Kolk et al., 2014). In this paper, we take up the question of how conflict  
 24 between selection in different domains of inheritance affects the evolution of a trait.

25 In order to address the question of conflicting selection in the cultural and ge-  
 26 netic domains, we derive a Price equation that explicitly incorporates both forms  
 27 of inheritance. The Price equation is an exact description of an evolutionary pro-  
 28 cess under a certain set of minimal assumptions (Price et al., 1970; Frank, 1998;  
 29 Rice, 2004). As early as (Hamilton, 1975) it was pointed out that the Price equa-  
 30 tion can apply equally well to cultural transmission, and recent authors have de-  
 31 veloped it for that purpose (Henrich, 2004a; El Mouden et al., 2014). Others have  
 32 also extended the Price equation to include multiple forms of inheritance (Day and  
 33 Bonduriansky, 2011; Helanterä and Uller, 2010), though they considered separate  
 34 traits being transmitted in each domain. Here, we use a simple additive model to

35 derive a Price equation that incorporates both domains of inheritance and their rel-  
 36 evant fitness measures directly. We then analyze the condition for the evolution  
 37 of a phenotype when selection in the two domains is in conflict. We take altruism  
 38 as a special case and present an illustrative model to explore the implications of  
 39 our results. The model shows that selection in one domain can overcome counter-  
 40 selection in the other domain under the right conditions. We then extend our Price  
 41 equation framework to more complicated models. We end with a discussion of the  
 42 implications of our results for understanding the evolution of maladaptive behav-  
 43 iors.

## 44 2 Gene-Culture Price equation

45 We model the evolution of a trait that results from both genetic and cultural inheri-  
 46 tance. Evolution here means the change in the phenotypes in a population, not only  
 47 the change in the genetic or culturally inherited information that underlies them.  
 48 An individual's phenotype is represented by a continuous variable,  $p$ . We can take  
 49 this to represent a behavioral trait, such as one of the big five personality traits (e.g.  
 50 extraversion, agreeableness, conscientiousness, etc.) (Goldberg, 1993). We assume  
 51 that the effects of genetic and cultural inheritance are additive, i.e., we express an  
 52 individual's phenotype as

$$p_j = c_j + g_j + e . \quad (1)$$

53 The final term,  $e$ , is the effect of the environment that does not include cultural  
 54 transmission (i.e. is not heritable). The two terms,  $c_j$  and  $g_j$  will be referred to as

the culture-type and genotype, respectively. These terms only describe the state of the continuous variables, and are not meant to imply any particular mode of inheritance (e.g. haploidy, diploidy, etc.). Equation (1) is similar to the quantitative genetic formulation in Otto et al. (Otto et al., 1995). The culture- and geno-types are determined by the corresponding values in  $j$ 's genetic and cultural ancestors. We assume that a descendant's culture-type and genotype are linear functions of her ancestors' values given by

$$g_j = \sum_{i=1}^N \nu_{ij} g_i + \Delta g_j \quad (2a)$$

$$c_j = \sum_{i=1}^N \gamma_{ij} c_i + \Delta c_j, \quad (2b)$$

where  $\nu_{ij}, \gamma_{ij} \in [0, 1]$  and  $\sum_{i=1}^N \nu_{ij} = \sum_{i=1}^N \gamma_{ij} = 1$ ; these values are the weights that describe the degree of influence an ancestor  $i$  has on descendant  $j$  in the genetic or cultural domain. For generality, we have taken the sums over all  $N$  individuals in the ancestral population. When  $i$  is not a genetic ancestor to  $j$ , then  $\nu_{ij} = 0$ ; when  $i$  is not a cultural ancestor,  $\gamma_{ij} = 0$ . The delta terms,  $\Delta g_j$  and  $\Delta c_j$ , represent departures in  $j$  from the inherited genetic and cultural values. As an example,  $\Delta g_j$  may be nonzero in the event of mutation or recombination, while  $\Delta c_j$  may be nonzero due to individual learning or experience. This model generalizes that presented by El Mouden et al. (El Mouden et al., 2014), though our analysis and conclusions differ.

Equation (1) explicitly identifies the two modes of inheritance that affect the phenotype in question. This formulation keeps cultural and genetic lineages separate, ensuring that a descendant will not inherit via genes information that its

74 ancestor inherited via social learning and vice versa. Equations (2) ensure that the  
 75 effects of selection and transmission in the two domains of inheritance are kept sep-  
 76 arate. This is an important point: if the two modes of inheritance were not explicitly  
 77 described, then a departure in phenotype from one's genetic ancestors would in-  
 78 clude the effect of cultural inheritance, while a departure in phenotype from one's  
 79 cultural ancestors would include genetic inheritance. Equations (2) allows us to  
 80 avoid confounding the effects of the two modes of inheritance.

81 Fitness captures the contribution of an ancestor to the next generation. In this  
 82 model, that contribution, whether genetic or cultural, is determined by the weights  
 83 given to an ancestor by her descendants. Thus, the fitness of an individual in either  
 84 domain of inheritance is simply the sum of the weights given to an ancestor by  
 85 all descendants. Specifically we define the genetic fitness of an ancestor  $i$  as  $w_i =$   
 86  $\sum_{j=1}^{N'} \nu_{ij}$  and the cultural fitness,  $s_i = \sum_{j=1}^{N'} \gamma_{ij}$ , where the sums are taken over the  
 87 descendant generation. For example, for a haploid organism, all  $\nu_{ij}$  are either 1  
 88 or 0, and  $w_i$  is simply equal to the number of offspring (in the diploid, sexually  
 89 reproducing case,  $\nu_{ij} = \{0, 1/2\}$ ). In the cultural domain, the definition of  $s_i$  shows  
 90 that the total amount of influence an ancestor  $i$  has on descendant phenotypes is  
 91 what matters most, not just the number of individuals over which  $i$  has had some  
 92 non-zero influence.

93 Using these definitions and equation 1, we can derive the following Price equa-  
 94 tion to describe the evolutionary change in the mean value of the phenotype (see  
 95 A-1),

$$\Delta \bar{p} = \frac{1}{\bar{w}} \text{cov}(w, g) + \frac{1}{\bar{w}} \text{cov}(s, c) + \langle \Delta g \rangle + \langle \Delta c \rangle. \quad (3)$$

Just as in the standard Price equation, the covariance terms represent the effects of selection and drift (Rice, 2004) on evolutionary change. Importantly, we can separate the effects of differential reproduction ( $\frac{1}{\bar{w}}\text{cov}(w, g)$ ) and differential influence in cultural transmission ( $\frac{1}{\bar{w}}\text{cov}(s, c)$ ). Importantly,  $\bar{s} = \bar{w}$ , which is equivalent to everyone receiving some cultural input. The remaining terms are the effects due to spontaneous departure from one's inherited information, such as mutation or recombination in genes, or individual trial-and-error learning in culture. This approach means that each of the four terms in equation 3 can be given a clear biological interpretation and, crucially, that each term represents an exclusive evolutionary effect.

We can use equation (3) to examine evolutionary change when there are conflicts between cultural and genetic selective forces. Is it possible for a trait that is favored by social learning but detrimental to reproductive fitness to evolve? For example, let us imagine a socially acquired preference that leads to decreased reproduction, as in some cultural evolution models of the demographic transition (Ihara and Feldman, 2004; Kolk et al., 2014). Let higher values of  $p$  reduce fitness, that is to say,  $\text{cov}(w, p) < 0$ . Then we have the following condition,

$$\text{cov}(s, c) > -\text{cov}(w, g) - \bar{w} \langle \Delta c \rangle, \quad (4)$$

where we have ignored the genetic transmission term  $\langle \Delta g \rangle$  under the assumption that mutation and recombination effects are unbiased with respect to genotypic value. Putting aside for the moment the cultural transmission term, this condition states that the mean value of  $p$  can increase—despite reducing reproductive

117 fitness—so long as the covariance between cultural value and influence on descen-  
 118 dants exceeds the absolute value of the covariance between genotype and repro-  
 119 ductive fitness. In essence, a loss in reproductive fitness can be compensated for by  
 120 increased importance as a learning model. However, this condition will be harder  
 121 to meet if social learning biases individuals toward lower cultural values than their  
 122 learning models, for example, as a result of biased learning error (Henrich, 2004b).

123 Intuitively, whether individuals give higher or lower weights to ancestors with  
 124 higher cultural values determines the direction of evolution of  $p$ . This can be seen  
 125 by observing that the cultural covariance term can be rewritten as

$$cov(s_i, c_i) = N' \langle cov(\gamma_{ij}, c_i) \rangle = N' \langle \beta_{\gamma c}^j \rangle var(c), \quad (5)$$

126 where the brackets indicate the mean over the descendant population and  $N'$  is the  
 127 descendant population size. The term inside the brackets applies to an *individual*  
 128 *descendant*; it is the correlation between the weight that particular descendant as-  
 129 cribes to ancestors and those ancestors' cultural values (computed for all potential  
 130 ancestors). When this term is positive, it means that, on average, greater weight is  
 131 given to ancestors with higher values of  $c$ . We can now rewrite eq. (4) as a new  
 132 inequality that shows explicitly how strong the bias in favor of higher  $c$  must be in  
 133 order for there to be positive evolutionary change,

$$\langle \beta_{\gamma c}^j \rangle > -\frac{1}{N} \left[ \frac{\beta_{wg}}{\bar{w}} \frac{var(g)}{var(c)} + \frac{\langle \Delta c \rangle}{var(c)} \right] \quad (6)$$

134 Condition (4) gives us the criterion for maladaptive phenotypes with respect to how



ancestors'  $c$  values translate into cultural fitness. The condition in (6) allows us to see the same condition from the 'descendant's point of view'. The correlation term  $\beta_{\gamma c}^j$  characterizes the learning rule a descendant  $j$  employs. It is the population average of the learning rule employed by descendants that determines the direction of evolutionary change. Importantly, we also see that the strength of the genetic selection term (first term inside the brackets) is modified by the relative variance in genotypes and culture-types. This is a result of having multiple selection terms in our Price equation. In fact, Hamilton (1975) pointed out a similar effect in his multi-level selection version of the Price equation, where the variances corresponded to individual and group level characters (Hamilton, 1975). It is important to point out here that while group and individual level variances are just different ways of partitioning the population variance (and hence have to add up to the total variance), here we have variances of two different variables whose values are unconstrained by one other. We will see this ratio play an important role in the next section.

## 2.1 Cultural Evolution of Altruism

We now examine a question that has received considerable attention in the cultural evolution literature: whether cultural transmission can lead to the evolution of altruism even when natural selection would not (Henrich, 2004a; Boyd and Richerson, 2009; Boyd et al., 2011; Lehmann et al., 2008; Lehmann and Feldman, 2008; André and Morin, 2011). To be precise, by altruism we mean a behavior that reduces the fitness (genetic and/or cultural) of a focal individual while increasing the fitness of others, when the fitness effects of others on the focal individual are

157 ignored (Hamilton, 1964; Rousset, 2013). For the moment we will assume that the  
 158 fitness cost is both genetic and cultural; later we explore the effect of relaxing this  
 159 assumption. Let  $p$  now represent the level of altruistic behavior and the cultural  
 160 and genetic fitnesses be given by the following equations:

$$s_i = s_0 + \beta_{sp}p_i + \beta_{s\tilde{p}}\tilde{p}_i \quad (7)$$

$$w_i = w_0 + \beta_{wp}p_i + \beta_{w\tilde{p}}\tilde{p}_i \quad (8)$$

161 The tilde over a variable indicates the mean value of that variable across  $i$ 's neigh-  
 162 bors. We have assumed both kinds of fitness are linear functions of an individu-  
 163 als own phenotype and the phenotypes of her neighbors, where  $s_0$  and  $w_0$  are the  
 164 baseline fitnesses. As in the standard derivation of Hamilton's rule using the Price  
 165 equation, it is customary to identify  $\beta_{wp}$  and  $\beta_{w\tilde{p}}$  as the cost ( $C$ ) to an altruist and  
 166 benefit ( $B$ ) to recipients of altruism, respectively (Frank, 1998; Rice, 2004; McElreath  
 167 and Boyd, 2008). We will use the same convention, but add subscripts to indicate  
 168 costs and benefits to genetic *and* cultural fitnesses.

$$\beta_{wp} \Rightarrow -C_g$$

$$\beta_{cp} \Rightarrow -C_c$$

$$\beta_{w\tilde{p}} \Rightarrow B_g$$

$$\beta_{c\tilde{p}} \Rightarrow B_c$$

169

170 By labeling these terms, we'll be able to more clearly interpret our key results. We  
171 can derive the following condition (*see* A-2),

$$B_c(\beta_{tilde{c}} + \beta_{gc}) - C_c(1 + \beta_{gc}) > - \left[ B_g(\beta_{tilde{g}} + \beta_{cg}) - C_g(1 + \beta_{cg}) \right] \frac{var(g)}{var(c)}, \quad (9)$$

172 where we've ignored the transmission terms. Written this way, we can see that the  
173 left-hand side is the cultural selection coefficient, where selection must also account  
174 for correlations between an actor's culture-type and neighbor genotypes, as well as  
175 any correlation between her own culture-type and genotype. Similarly, the right-  
176 hand side features the genetic selection coefficient in brackets, where we have again  
177 correlations between culture-types and genotypes. Importantly, the inequality says  
178 that the cultural selection coefficient must exceed the genetic selection coefficient,  
179 again, as in (6), scaled by the ratio of the variance in genotypes to cultural types.  
180 Thus, even relatively weak cultural selection can overcome genetic selection if the  
181 variance in culture-types is sufficiently high compared to the variance in genotypes.

182 Below we will explore the consequences of (9) using a simple illustrative model.

### 183 3 An illustrative model

184 We imagine a population of haploid individuals interacting assortatively in each  
185 generation. These interactions determine the reproductive output of each individ-  
186 ual and, potentially, their cultural influence on the next generation. Each individual  
187 possesses two loci with a single 'allele' at each locus. At the first locus, alleles are  
188 transmitted genetically, from a single parent to her offspring; at the other locus, a

189 ‘cultural allele’ is acquired from a single cultural parent. An individual’s pheno-  
 190 type is determined by the combined additive effect of the alleles at the two loci in  
 191 the following way: when two individuals interact they play a prisoner’s dilemma;  
 192 each individual employs a mixed strategy where the phenotype,  $p$ , is the proba-  
 193 bility of playing ‘cooperate’. Those with both the genetic and cultural alleles for  
 194 altruism play a pure strategy of cooperate; those with only the genetic or cultural  
 195 allele, play cooperate half of the time; finally, an individual that lacks both the ge-  
 196 netic and cultural alleles will play a pure strategy of defect. Thus we have four  
 197 types of individuals in the population  $\{0, 0\}, \{0, 1\}, \{1, 0\}, \{1, 1\}$ , with phenotypes  
 198  $p_{00} = 1, p_{01} = p_{10} = 1/2, p_{11} = 1$ .

199 An individual of type  $\psi$  has an expected reproductive fitness of

$$w_\psi = w_0 + B_g \tilde{p}_\psi - C_g p_\psi \quad (10)$$

200 where  $w_0$  is the baseline fitness,  $\tilde{p}_\psi$  is the expected phenotype of a type  $\psi$  individ-  
 201 ual’s opponent in the game, and  $p_\psi$  is the phenotype of a type  $\psi$  individual.

202 Players in the model interact assortatively with respect to both genes and cul-  
 203 ture. The correlation between the genotypes of a player and her opponent is  $f_g$ ,  
 204 while the correlation in culture-types is  $f_c$ . If individuals were interacting with  
 205 kin,  $f_g$  would be the probability of being identical-by-descent, and  $f_c$  would be the  
 206 analogous value computed for a cultural genealogy Aguilar and Ghirlanda (2015).  
 207 For our purposes, we can ignore the specific nature of the assortment mechanism  
 208 and just say that with some probability,  $f_g$ , an individual chooses a partner of iden-  
 209 tical genotype, and otherwise selects her partner at random (with an analogous

210 situation for culture-type). Then the probability of having an opponent of a certain  
 211 type will be conditional on one's own type. For example, the probability that a type  
 212  $\{1, 1\}$  interacts with another  $\{1, 1\}$  is,

$$P(1, 1|1, 1) = f_g f_c + f_c(1 - f_g)q_g + f_g(1 - f_c)q + (1 - f_c)(1 - f_g)q_g q_c \quad (11)$$

213 where  $q_g$  and  $q_c$  are the population frequencies of the genetic and cultural altruistic  
 214 alleles. The first term is the probability that two  $\{1, 1\}$  individuals are identical due  
 215 to assortment; the second is the probability of being identical due to assortment for  
 216 culture but not genes; the third is the probability of being identical due to assort-  
 217 ment for genes and not culture; and the final term is the probability of not being  
 218 identical due to assortment either genetically or culturally. These conditional prob-  
 219 abilities then determine the expected phenotype of an individual's opponent in the  
 220 game,  $\tilde{p}_\psi$ . Further details on the model are provided in SI-1.

221 Offspring inherit their parent's genetic allele. They must then choose a cultural  
 222 model whose allele they will inherit at the cultural locus. Below, we consider two  
 223 models for how cultural models are chosen.

### 224 **3.1 Model 1: Neutral cultural trait**

225 First, we assume that the cultural propensity of altruism is neutral for cultural fit-  
 226 ness. In other words, ancestors are chosen as cultural parents without regard to  
 227 their cultural traits, so the probability of acquiring the cultural propensity for al-  
 228 truism will just be  $q_c$ , the population frequency of the cultural allele in the parental

229 generation. We can use (9) to determine the condition for the increase in the al-  
 230 truistic phenotype by multiplying both sides of the inequality by  $var(c)$  and com-  
 231 puting the covariances directly from the model. We have no cultural selection, so  
 232  $B_c = C_c = 0$ . Since culture is chosen at random, genetic and cultural type are  
 233 uncorrelated, so that  $cov(c, g) = cov(\tilde{c}, g) = cov(\tilde{g}, g) = 0$ . Thus, (9) reduces to

$$B_g f_g > C_g,$$

234 the canonical form of Hamilton's rule. This result follows directly from the cul-  
 235 tural allele being chosen at random. Under random copying the expected change  
 236 in the frequency of the cultural allele is zero and the only change in mean pheno-  
 237 type will be due to changes in the frequency of the genetic allele. Further, with  
 238 no correlations between the genetic and cultural allele, the only forces affecting the  
 239 evolution of the genetic allele will be the reproductive fitness effects. However, it  
 240 should be noted that due to the dual inheritance of altruism, the value of the phe-  
 241 notype may be maintained at significant levels in the population if the frequency of  
 242 the cultural allele is high. Take the extreme case where  $q_c = 1$ . Even if the inequal-  
 243 ity above is not met and the genetic allele is driven to extinction, the cultural allele  
 244 will be unaffected and the mean value of the phenotype in the population will be  
 245  $\bar{p} = q_c/2 = 1/2$ . In other words, there will be no perfect altruists, but everyone will  
 246 be a 'half' altruist. As the mean reproductive fitness,  $\bar{w}$  depends on the mean phe-  
 247 notype, this could have important implications for population growth, including  
 248 eventual extinction.

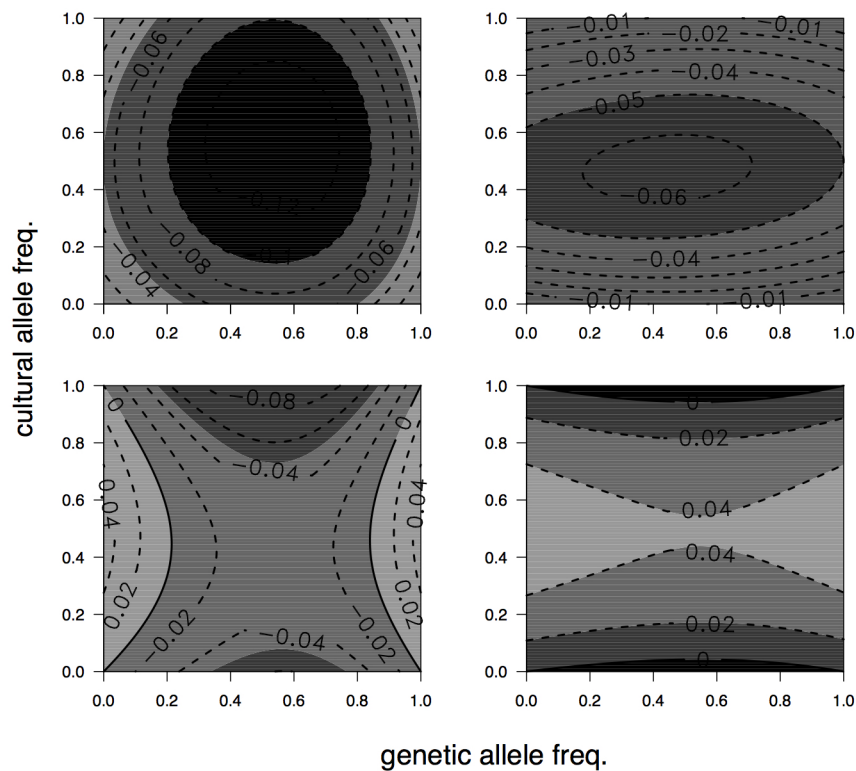

Figure 1: Surfaces showing the selection differential on the altruistic phenotype for fixed values  $B_c^z = 2$ ,  $C_c^z = 1$ ,  $B_g = 1$ ,  $C_g = 1$ , and varied values of assortment probabilities,  $f_g, f_c$ . Lighter shades indicate higher values. The zero contour is the solid line. (Top left)  $f_c = 0.1$  and  $f_g = 0.1$ ; (Top right)  $f_c = 0.1$ ,  $f_g = 0.9$ ; (Bottom left)  $f_c = .9$ ,  $f_g = 0.1$ ; (Bottom right)  $f_c = 0.9$ ,  $f_g = 0.9$ . Higher cultural assortment values lead to positive selection differentials, especially for mid-range values of  $q_c$ .

## 3.2 Model 2: Cultural prisoner's dilemma

Next, we consider a case where offspring no longer choose their cultural parent at random. In particular, we assume that individuals meet to play the prisoner's dilemma, this time with respect to both reproduction and cultural propagation. For simplicity, we'll imagine individuals producing cultural 'gametes' or behavioral tokens that can then be acquired or observed by offspring. The number of cultural gametes,  $z$ , that an individual of type  $\psi$  produces is,

$$z_\psi = z_0 + B_c^z \tilde{p}_\psi - C_c^z p_\psi \quad (12)$$

The terms  $B_c^z$  and  $C_c^z$  are the gametic fitness benefit and cost, with  $B_c = B_c^z / \bar{z}$ ,  $C_c = C_c^z / \bar{z}$  (see SI-2). Recall that in the previous section cultural fitness was defined in terms of the total influence ( $s_i = \sum_{j=1}^{N'} \gamma_{ij}$ ) an ancestor has on the descendant population. In this model, offspring have a single cultural ancestor (i.e.  $\gamma_{ij} = 1$ ), and  $s_i$  is just the total number of descendant individuals who count  $i$  as an ancestor. The number of offspring available as cultural descendants is determined by the reproductive output of the population, thus,

$$s_i = \frac{z_i}{\bar{z}} \bar{w}. \quad (13)$$



263 Substituting (12) and (13) into the gene-culture Price equation and making simpli-  
264 fications, we obtain:

$$B_c^z f_c - C_c^z > -[B_g f_g - C_g] \frac{q_g(1 - q_g)}{q_c(1 - q_c)} \frac{\bar{z}}{\bar{w}}. \quad (14)$$

265 In this condition we see an explicit dependence on the frequency of the cultural  
266 and genetic alleles. Using the definition of cultural fitness given in (13), we see that  
267  $\bar{w}/\bar{z} = s_i/z_i$ , the number of cultural descendants per gamete produced. We can  
268 rename this term the cultural viability,  $v_z$ . When  $v_z$  is high, the RHS is reduced and  
269 a weaker cultural selection coefficient can still lead to an increase in the altruistic  
270 phenotype. But what does this viability term actually mean? We can view it as the  
271 average effort spent by one ancestor per cultural descendant. As that effort grows,  
272  $v_z$  decreases, and the effect of genetic selection increases. Thus, as individuals must  
273 expend more effort to gain influence over a cultural descendant, condition (14) will  
274 be harder to meet.

275 The ratio of the variances in (14), means that if the genetic allele is at very high  
276 or very low frequency ( $q_g$  close to 0 or 1) and  $q_c$  is in the mid-range, the direction  
277 of evolution of the phenotype will be determined mostly by cultural selection. In  
278 Figure 1, we plot the the values of the overall effect of selection on the altruistic phe-  
279 notype (i.e. LHS-RHS in (14)) under different values of model parameters. We see  
280 that when assortment is low in both domains (Figure 1, top-left), the altruistic phe-  
281 notype is largely selected against. Conversely, when assortment in both domains is  
282 high (Figure 1, bottom-right), altruism is selected for. The more interesting case is  
283 when  $f_c$  is high and  $f_g$  is low (Figure 1, bottom-left); even though genetic selection

284 here is against altruism, the increased variance in culture when  $q_c$  is near 0.5 can  
285 lead to a positive overall selection effect.

286 We defined altruism with respect to both cultural and genetic fitnesses. In model  
287 I cultural transmission was neutral with respect to the altruistic phenotype, while  
288 in model II there was also a cultural fitness cost to the phenotype. Another possibil-  
289 ity is that a phenotype may be beneficial in the cultural domain while detrimental  
290 to reproduction. We can simply change the sign of the cost term on the LHS of (14)  
291 and see this has the effect of making the condition easier to meet. It is therefore  
292 important in addressing the evolution of a co-inherited trait that its relationship to  
293 fitness be specified with respect to both domains of inheritance.

## 294 **4 Non-additive phenotypes**

295 The results described above all assumed an additive phenotype function, which is a  
296 standard starting point in social evolution and population genetics theory (Van Cleve,  
297 2015). However, biological reality may be much more complicated, particularly  
298 when trying to incorporate the effects of multiple inheritance systems. One way to  
299 deal with this problem in evolutionary theory has been to observe that most genetic  
300 variants have small effects on phenotypes and genetic variation in the population  
301 is small, in which case, an additive approximation gives satisfactory results (Tay-  
302 lor and Frank, 1996; Akçay and Van Cleve, 2012). In this section, we translate this  
303 approach to phenotypes that are jointly determined by genes and culture.

304 We begin by assuming that an individual descendant  $j$ 's phenotype is given

by a function  $p_j(c_j, g_j)$ , where the arguments are the heritable cultural and genetic information descendant possessed by the descendant. This information in turn is a function of the heritable cultural and genetic information of the ancestors, which implies that we can instead write the phenotype mapping function as  $p_j(c_1, \dots, c_N, g_1, \dots, g_N)$ , a direct function of the ancestral culture-types and genotypes. Assuming that all  $p_j$  are differentiable with respect to ancestral values, we can make a first-order Taylor approximation of  $p_j$  around the point  $(\bar{c}, \bar{g}) = (\bar{c}, \dots, \bar{c}, \bar{g}, \dots, \bar{g})$ . We then substitute this expansion into  $\Delta\bar{p} = \frac{1}{N} \sum_{i=1}^N p_j - \bar{p}$  to arrive at a Price equation for the non-additive case (see SI-2),

$$\Delta\bar{p} = \frac{N}{N'} \text{cov}(\mathcal{S}_i, c_i) + \frac{N}{N'} \text{cov}(W_i, g_i) + \langle p_j(\bar{c}, \bar{g}) \rangle - \bar{p}, \quad (15)$$

where  $\mathcal{S}_i = \sum_{j=1}^{N'} \frac{\partial p_j}{\partial c_i} \bigg|_{(\bar{c}, \bar{g})}$  and  $W_i = \sum_{j=1}^{N'} \frac{\partial p_j}{\partial g_i} \bigg|_{(\bar{c}, \bar{g})}$ , refer to *generalized fitnesses* in the sense that we are measuring not only the number of descendant individuals an ancestor has, but also the combined effect of that ancestor on her descendants' phenotypes. For example, in a haploid genetic model in the absence of mutation, where the 'phenotype' of interest is just the genotype, then  $\frac{\partial p_j}{\partial g_i} = 1$  when  $i$  is a genetic ancestor of  $j$ , while  $\frac{\partial p_j}{\partial g_k} = 0$  for all individuals  $k$  that are not genetic ancestors to  $j$ . In this case, the generalized fitness just reduces to the number of descendant individuals who count  $i$  as an ancestor. Similarly, in the model presented in the first section, the partial derivative of the phenotype function  $p_j$  with respect to  $c_i$  will yield  $\gamma_{ij}$ , and  $\mathcal{S}_i = s_i$ . The advantage of this formulation is that more complicated phenotype mapping functions can be incorporated into the idea of a generalized

325 fitness.

326 Equation (15) looks similar to equation (3); first, we have two covariance terms  
 327 that account for the effect of selection (now with respect to generalized fitness).  
 328 We've replaced the inverse of the mean fitness with a more direct measure of pop-  
 329 ulation growth,  $(N/N')^{-1}$ ; this is because generalized fitness refers to the effect of  
 330 an ancestor on the phenotypes in the next generation, and is no longer synonymous  
 331 merely with her contribution to the growth of the population. The remaining term,  
 332  $\langle p_j(\bar{c}, \bar{g}) \rangle - \bar{p}$ , denotes the effect of transmission. Specifically, we see that this is the  
 333 difference between (1) the average phenotype that would occur if every individual  
 334 inherited the mean values of  $c$  and  $g$ , and (2) the mean phenotype among ancestors  
 335 ( $\bar{p}$ ). This isolates the effect of the phenotype functions among descendants,  $p_j$ , on  
 336 evolutionary change.

337 From eq. 15 we can simply derive a condition for the evolution of a maladaptive  
 338 trait. When  $\Delta\bar{p} > 0$ , we have,

$$\beta_{S_i, c_i} > - \left[ \beta_{W_i, g_i} \frac{\text{var}(g)}{\text{var}(c)} - \frac{(\langle p_j(\bar{c}, \bar{g}) \rangle - \bar{p})}{\text{var}(c)} \right] \quad (16)$$

339 This result is exactly analogous to (4) in the first section and can be summarized  
 340 similarly: a loss in generalized reproductive fitness can be compensated for by a  
 341 gain in generalized cultural fitness. Again, we have assumed that the rules of trans-  
 342 mission remain constant over the timescale being considered in the Price equation.

343 This approach could of course be extended to higher order expansions of the  
 344 phenotype function: in SI-2 we show that the infinite expansion of the pheno-  
 345 type function leads to a more precise definition of generalized fitness than appears

in this example. Most importantly, without making assumptions about either the phenotype mapping function or the fitness function, we have shown an important relationship between these two fundamental concepts in evolutionary theory.

## 5 Discussion

In animals capable of social learning, phenotypes may result from both genetic and cultural inheritance. We derived a Price equation for the evolution of a trait that is transmitted via both modes of inheritance. Under our model of additive effects of genes and culture, the forces of selection and transmission in each domain are explicitly represented. We showed that even weak selection in the cultural domain can overcome selection in the genetic domain so long as the variance in culture is sufficiently high relative to variance in genes (ignoring the effects of transmission).

The additive model we used in this paper is both the simplest model and a natural extension of the standard assumption in quantitative genetics (Falconer and Mackay, 1996). However, even under this simple model we observed some non-trivial results. In our formulation we made an important assumption that the mean cultural fitness was equal to the mean reproductive fitness (i.e.  $\bar{s} = \bar{w}$ ). We justify this assumption for many behavioral traits, such as personality traits, simply because every individual must possess them. However, for other traits, some individuals may never receive cultural input. For example, though underlying genetic variation may determine one's reading ability, one may never be taught to read. In these cases, the equality of  $\bar{s}$  and  $\bar{w}$  will not necessarily hold. As we saw in our

second illustrative model, when the mean number of replications for culture and reproduction are not the same—in this case  $\bar{z}$  and  $\bar{w}$ —the conversion factor  $\bar{z}/\bar{w}$  scaled the effect of genetic selection. In the event that cultural replication might affect fewer individuals than are actually born,  $\bar{z}/\bar{w} < 1$ , and the effect genetic selection is further reduced.

We also assumed here that the rules of cultural transmission are stable on the timescale of evolutionary change. This is also the case for genetic transmission, and is standard in all Price equation formulations. However, it is not unreasonable to assume that cultural transmission itself may be subject to evolution, and there is an extensive literature on the evolution of cultural transmission (Rogers et al., 2009; Boyd and Richerson, 1988; Henrich, 2004a; Lehmann and Feldman, 2008). We have taken the existence of cultural transmission as a given, which allowed us to focus on the effect of combined inheritance on a single trait. Given the evidence for the evolutionary history of cultural transmission in the human lineage (Lind et al., 2013), it is reasonable to assume that a number of traits evolved under the combined influence of genetic and cultural transmission. Therefore, it will be important to address in future work the simultaneous evolution of the cultural transmission rule, which in this paper is characterized by  $\langle \beta_{\gamma c}^j \rangle$ , the descendant mean of the correlation between  $\gamma_{ij}$  and  $c_i$ .

In the course of deriving our results on the effects of selection, we often ignored the transmission terms,  $\langle \Delta c \rangle$  and  $\langle \Delta g \rangle$ . In relatively simple genetic systems, it may be safe to assume that the expected difference between parents and offspring is zero. However, culture very often can make this assumption untenable, as the cul-

390 tural transmission system allows for biased or directed ‘mutation’ in the form of  
 391 individual learning and other factors. For example, individuals may systemati-  
 392 cally differ from their parents because they learn more appropriate responses to  
 393 their environment through their own trial-and-error learning. El Mouden et al.  
 394 (2015) offered an interpretation of the transmission term as evolved biases in favor  
 395 of reproductive fitness maximizing behaviors. Meanwhile, Henrich (2004) took the  
 396 transmission term to represent systematic error in cultural learning that biased in-  
 397 dividuals to trait values lower than their cultural parents. These examples hint at  
 398 the diverse interpretations that can be ascribed to the transmission term, particu-  
 399 larly in lieu of empirical evidence on how a specific trait is passed on. These effects  
 400 also present important future directions for a more complete framework of gene-  
 401 culture co-evolution.

402 Our results show the importance of the ratio of genetic to cultural variance in  
 403 scaling the effect of genetic selection. It is interesting to consider empirical estimates  
 404 of cultural and genetic diversity to gauge the expected relative strength of genetic  
 405 selection. Bell et al. compared  $F_{st}$  values for culture and genes in populations using  
 406 the World Values Survey (Bell et al., 2009). Their results suggested greater-between  
 407 population variation in culture than in genes. Unfortunately, these results say little  
 408 about the within-group variance in culture relative to genes. Other studies have  
 409 shown parallels in the patterns of linguistic and genetic diversity (Perreault and  
 410 Mathew, 2012; Longobardi et al., 2015), but again provided no information about  
 411 the ratio of genetic to cultural variance. However, this question is well-suited to  
 412 empirical study; given our results, empirical estimates of the ratio can shed light

413 on qualitative expectations about the evolution of behavioral traits.

414 The ratio of genetic to cultural variance also has an important relationship to the  
 415 narrow-sense heritability ( $h^2$ ), which measures the proportion of phenotypic vari-  
 416 ance attributable to the ‘heritable’ component of phenotype (Falconer and Mackay,  
 417 1996). In a series of papers, Danchin and co-authors (Danchin and Wagner, 2010;  
 418 Danchin et al., 2011, 2013) introduced the idea of ‘inclusive heritability’, which par-  
 419 titions the variance in the heritable component of phenotype into the contributions  
 420 from each system of inheritance. This allows for narrow-sense heritability to be ex-  
 421 pressed as the sum of the heritabilities in each domain (assuming no interactions  
 422 between the inheritance systems). In our model, this means  $h^2 = h_g^2 + h_c^2$  (where  
 423  $h_g^2$  and  $h_c^2$  are the genetic and cultural heritabilities). The ratio of these heritabili-  
 424 ties is exactly the term that appears in our results as the scaling factor of genetic  
 425 selection, demonstrating the importance of inclusive heritability when considering  
 426 evolutionary outcomes.

427 Other authors have presented extensions of the Price equation to multiple sys-  
 428 tems of inheritance (Day and Bonduriansky, 2011; Helanterä and Uller, 2010). In  
 429 particular, Day & Bondurianski wrote coupled Price equations to describe the co-  
 430 evolution of two traits where one was transmitted genetically and the other by a  
 431 nongenetic mode of inheritance (e.g. culture). However, in their model, selection  
 432 in both domains acted on biological reproduction. Cultural transmission allows  
 433 for the propagation of hereditary information to individuals who are not biologi-  
 434 cal offspring, and the extent of success in cultural transmission need not coincide  
 435 with reproductive success. Our model allows for cultural and genetic fitness to di-



436 verge. El Mouden et al. also compared evolution under cultural transmission to  
437 that under genetic transmission using a Price equation (El Mouden et al., 2014).  
438 However, this approach confounds the effects of culture and genes, since genes  
439 cause transmission effects with respect to culture and vice versa. By contrast, our  
440 model allows all the evolutionary effects of the two systems of inheritance to be  
441 expressed simultaneously.

442 In our section on non-additivity, we took an unusual approach to deriving the  
443 Price equation. Most models of social evolution make an explicit assumption about  
444 the fitness function (e.g. linearity, as in our derivation of the gene-culture Hamil-  
445 ton's rule) and an implicit assumption about the phenotype function (e.g.  $p = g$ , as  
446 in the phenotypic gambit). By contrast, we made no assumptions about the form  
447 of the phenotype function, with the exception of differentiability, and were able  
448 to derive a definition of fitness that similarly relied on no previous assumptions  
449 about the fitness function. This approach demonstrates the relationship between  
450 how phenotypes are actually constructed from inherited information and fitness it-  
451 self. Also, our notion of generalized fitness incorporates both the idea of the fitness  
452 of a specific lineage and the fitness of a particular type. The relationship between  
453 generalized fitness and other important fitness concepts, such as inclusive fitness,  
454 are worth exploring, but beyond the scope of the present paper.

455 Richerson & Boyd (1978) also assumed that phenotype was a generic function  
456 of genotype and culture-type, though they included a 'penetrance' parameter that  
457 determined the relative importance of the two kinds of inheritance (Richerson and  
458 Boyd, 1978). They analyzed equilibrium phenotype when cultural and genetic fit-

ness were maximized at different phenotypic values. They found that under certain conditions, the equilibrium phenotype could be the cultural-fitness maximizing phenotype, even when the ‘penetrance’ parameter was under genetic control. These intriguing results are in qualitative agreement with ours, though they deserve further investigation.

Our model was inspired by the idea that behavioral traits can be influenced by both genetic and cultural evolution. Research into the evolutionary basis of human behavior has long puzzled over the existence of maladaptive behaviors (Glanville, 1987; Logan and Qirko, 1996). These are behaviors that persist via cultural transmission despite detrimental reproductive fitness effects, such as clubbing pregnant women to induce birth in Colombia (Reichel-Dolmatoff and Reichel-Dolmatoff, 2013), unhygienic neonatal care practices in Bangladesh (McConville, 1988), and folk medical practices like ingesting rhino horn (Ayling, 2013) or blood-letting (Wootton, 2007). While these practices are likely spread almost exclusively by cultural transmission, other maladaptive behaviors, such as the cross-cultural variation in risk-taking (Weber and Hsee, 1998; Hsee and Weber, 1999), may have a significant genetic component. The demographic transition provides another potential example of a dually inherited trait. In fact, Kolk et al. (Kolk et al., 2014) presented a model in which reproductive behavior resulted from a genetic predisposition and exposure to cultural models. Our model demonstrates more broadly the possibility that maladaptive behavioral traits may evolve under dual transmission, despite their reproductive fitness costs.

## 481 5.1 Conclusions

482 The Price equation offers a general statement of how evolutionary change can be  
 483 partitioned among different evolutionary factors (Frank, 2012). Its generality arises  
 484 from its relative lack of assumptions. However, in applying the Price equation to  
 485 any system, it is important to be clear about the assumptions being made based  
 486 on knowledge of that system. We have applied the Price equation to the evolu-  
 487 tion of a behavioral trait that is jointly determined by culture and genes. We've  
 488 made our assumptions clear: an additive phenotype function and the stability of  
 489 transmission rules over the evolutionary timescale. Using only these assumptions  
 490 we show the conditions under which a maladaptive trait may evolve, and when  
 491 altruism will be favored. While the validity of our assumptions may rightfully be  
 492 challenged, the results follow clearly. Any departure from these results must be  
 493 based on a difference in the underlying assumptions, an important point that can  
 494 be obscured when directly comparing specific mechanistic models. We also move  
 495 beyond the additive phenotype function assumption, and point toward a general  
 496 framework for dealing with phenotypes that receive different heritable inputs. As  
 497 the importance of nongenetic inheritance systems becomes clearer, we believe this  
 498 framework will contribute to a better theoretical understanding of evolution.

## 499 Literature Cited

500 Aguilar, E., and S. Ghirlanda. 2015. Modeling the genealogy of a cultural trait.  
 501 Theor. Popul. Biol. 101:1–8.

- 502 Akçay, E., and J. Van Cleve. 2012. Behavioral Responses in Structured Populations  
503 Pave the Way to Group Optimality. *Am. Nat.* 179:257–269.
- 504 André, J.-B., and O. Morin. 2011. Questioning the cultural evolution of altruism. *J.*  
505 *Evol. Biol.* 24:2531–2542.
- 506 Ayling, J. 2013. What sustains wildlife crime? Rhino horn trading and the resilience  
507 of criminal networks. *J Int Wildl Law Policy* 16:57–80.
- 508 Bell, A. V., P. J. Richerson, and R. McElreath. 2009. Culture rather than genes pro-  
509 vides greater scope for the evolution of large-scale human prosociality. *Proc.*  
510 *Natl. Acad. Sci. USA* 106:17671–17674.
- 511 Boyd, R., H. Gintis, S. Bowles, and P. J. Richerson. 2003. The evolution of altruistic  
512 punishment. *Proc. Natl. Acad. Sci. USA* 100:3531–3535.
- 513 Boyd, R., and P. J. Richerson. 1988. Culture and the evolutionary process. University  
514 of Chicago Press.
- 515 Boyd, R., and P. J. Richerson. 2009. Culture and the evolution of human cooperation.  
516 *Phil. Trans. R. Soc. B.* 364:3281–3288.
- 517 Boyd, R., P. J. Richerson, and J. Henrich. 2011. Rapid cultural adaptation can facili-  
518 tate the evolution of large-scale cooperation. *Behav. Ecol. Sociobiol.* 65:431–444.
- 519 Cavalli-Sforza, L. L., and M. W. Feldman. 1981. Cultural transmission and evolu-  
520 tion: a quantitative approach. 16, Princeton University Press.

- 521 Danchin, E., A. Charmantier, F. A. Champagne, A. Mesoudi, B. Pujol, and  
522 S. Blanchet. 2011. Beyond DNA: integrating inclusive inheritance into an ex-  
523 tended theory of evolution. *Nature Rev Genet* 12:475–486.
- 524 Danchin, E., B. Pujol, and R. H. Wagner. 2013. The double pedigree: a method  
525 for studying culturally and genetically inherited behavior in tandem. *PloS one*  
526 8:e61254.
- 527 Danchin, E., and R. H. Wagner. 2010. Inclusive heritability: combining genetic and  
528 non-genetic information to study animal behavior and culture. *Oikos* 119:210–  
529 218.
- 530 Day, T., and R. Bonduriansky. 2011. A unified approach to the evolutionary conse-  
531 quences of genetic and nongenetic inheritance. *Am. Nat.* 178:E18–E36.
- 532 El Mouden, C., J.-B. André, O. Morin, and D. Nettle. 2014. Cultural transmission  
533 and the evolution of human behaviour: a general approach based on the Price  
534 equation. *J. Evol. Biol.* 27:231–241.
- 535 Falconer, D. S., and T. F. Mackay. 1996. Introduction to quantitative genetics. Har-  
536 low, UK: Longman .
- 537 Fowler, J. H., L. A. Baker, and C. T. Dawes. 2008. Genetic variation in political par-  
538 ticipation. *Am. Polit. Sci. Rev.* 102:233–248.
- 539 Frank, S. A. 1998. Foundations of social evolution. Princeton University Press.
- 540 Frank, S. A. 2012. Natural selection. IV. The Price equation. *J. Evol. Biol.* 25:1002–  
541 1019.

- 542 Glanville, E. 1987. The uses of biology. *rev. Anthropol.* 14:200–204.
- 543 Goldberg, L. R. 1993. The structure of phenotypic personality traits. *Am. Psychol.*  
544 48:26.
- 545 Guzmán, R. A., C. Rodríguez-Sickert, and R. Rowthorn. 2007. When in Rome, do  
546 as the Romans do: the coevolution of altruistic punishment, conformist learning,  
547 and cooperation. *Evol. Hum. Behav.* 28:112–117.
- 548 Hamilton, W. D. 1964. The genetical evolution of social behaviour. *J. Theor. Biol.*  
549 7:1–16.
- 550 Hamilton, W. D. 1975. Innate social aptitudes of man: an approach from evolution-  
551 ary genetics. *Biol. Anthropol.* 133:155.
- 552 Helanderä, H., and T. Uller. 2010. The Price equation and extended inheritance.  
553 *Philosophy & Theory in Biology* 2.
- 554 Henrich, J. 2004a. Cultural group selection, coevolutionary processes and large-  
555 scale cooperation. *J. Econ. Behav. Organ.* 53:3–35.
- 556 Henrich, J. 2004b. Demography and cultural evolution: how adaptive cultural pro-  
557 cesses can produce maladaptive losses: the Tasmanian case. *American Antiquity*  
558 :197–214.
- 559 Hsee, C. K., and E. U. Weber. 1999. Cross-national differences in risk preference  
560 and lay predictions. *J. Behav Decis Making* 12.

- 561 Ihara, Y., and M. W. Feldman. 2004. Cultural niche construction and the evolution  
562 of small family size. *Theor. Popul. Biol.* 65:105–111.
- 563 Kolk, M., D. Cownden, and M. Enquist. 2014. Correlations in fertility across gener-  
564 ations: can low fertility persist? *Proc. R. Soc. Lond. B* 281:20132561.
- 565 Lehmann, L., and M. W. Feldman. 2008. The co-evolution of culturally inher-  
566 ited altruistic helping and cultural transmission under random group formation.  
567 *Theor. Popul. Biol.* 73:506–516.
- 568 Lehmann, L., M. W. Feldman, and K. R. Foster. 2008. Cultural transmission can  
569 inhibit the evolution of altruistic helping. *Am. Nat.* 172:12–24.
- 570 Lind, J., P. Lindenfors, S. Ghirlanda, K. LidÅln, and M. Enquist. 2013. Dating human  
571 cultural capacity using phylogenetic principles. *Sci. Rep.* 3.
- 572 Logan, M. H., and H. N. Qirko. 1996. An evolutionary perspective on maladaptive  
573 traits and cultural conformity. *American Journal of Human Biology* 8:615–629.
- 574 Longobardi, G., S. Ghirotto, C. Guardiano, F. Tassi, A. Benazzo, A. Ceolin, and  
575 G. Barbujani. 2015. Across Language Families: Genome diversity mirrors lin-  
576 guistic variation within Europe. *Am. J. Phys. Anthropol.* 157:630–640.
- 577 McConville, F. 1988. The birth attendant in Bangladesh. London England Pandora  
578 Press 1988.
- 579 McElreath, R., and R. Boyd. 2008. Mathematical models of social evolution: A guide  
580 for the perplexed. University of Chicago Press.

- 581 Otto, S. P., F. B. Christiansen, and M. W. Feldman. 1995. Genetic and cultural in-  
582 heritance of continuous traits. Morrison Institute for Population and Resource  
583 Studies Paper Number 64.
- 584 Perreault, C., and S. Mathew. 2012. Dating the origin of language using phonemic  
585 diversity. PloS one 7:e35289.
- 586 Price, G. R., et al. 1970. Selection and covariance. Nature 227:520–21.
- 587 Reichel-Dolmatoff, A., and G. Reichel-Dolmatoff. 2013. The people of Aritama: The  
588 cultural personality of a Colombian mestizo village. Routledge.
- 589 Rice, S. H. 2004. Evolutionary theory: mathematical and conceptual foundations.  
590 Sinauer Associates Sunderland.
- 591 Richerson, P. J., and R. Boyd. 1978. A dual inheritance model of the human evo-  
592 lutionary process I: basic postulates and a simple model. J. Soc. & Biol. Struct.  
593 1:127–154.
- 594 Rogers, D. S., M. W. Feldman, and P. R. Ehrlich. 2009. Inferring population histories  
595 using cultural data. Proc. R. Soc. Lond. BB: Biological Sciences 276:3835–3843.
- 596 Rousset, F. 2013. Genetic structure and selection in subdivided populations (MPB-  
597 40). Princeton University Press.
- 598 Taylor, P. D., and S. A. Frank. 1996. How to make a kin selection model. J. Theor.  
599 Biol. 180:27–37.



- 600 Turkheimer, E. 2000. Three laws of behavior genetics and what they mean. *Curr.*  
601 *Dir. Psychol. Sci.* 9:160–164.
- 602 Van Cleve, J. 2015. Social evolution and genetic interactions in the short and long  
603 term. *Theor. Popul. Biol.* 103:2–26.
- 604 Ward, M. E., G. McMahon, B. St Pourcain, D. M. Evans, C. A. Rietveld, D. J. Ben-  
605 jamin, P. D. Koellinger, D. Cesarini, G. D. Smith, N. J. Timpson, et al. 2014. Genetic  
606 variation associated with differential educational attainment in adults has antic-  
607 ipated associations with school performance in children. *PloS one* 9:e100248.
- 608 Weber, E. U., and C. Hsee. 1998. Cross-cultural differences in risk perception,  
609 but cross-cultural similarities in attitudes towards perceived risk. *Manag. Sci.*  
610 44:1205–1217.
- 611 Wootton, D. 2007. *Bad medicine: doctors doing harm since Hippocrates.* Oxford  
612 University Press.

# Appendices

## A-1 Derivation of Gene Culture Price equation.

The phenotype of individual  $j$  is given by,

$$p_j = \sum_{i=1}^N \nu_{ij} g_i + \Delta g_j + \sum_{i=1}^N \gamma_{ij} c_i + \Delta c_j + e \quad (\text{A-1})$$

where the coefficients  $\nu_{ij}$  and  $\gamma_{ij}$  represent the influence an ancestor  $i$  has on descendant  $j$  in the genetic and cultural domains, respectively (Note:  $\sum_{i=1}^N \nu_{ij} = \sum_{i=1}^N \gamma_{ij} = 1$ ). The mean value of  $p$  in the descendant generation is,

$$\bar{p}' = \frac{1}{N'} \sum_{j=1}^{N'} \sum_{i=1}^N \nu_{ij} g_i + \frac{1}{N'} \sum_{j=1}^{N'} \Delta g_j + \frac{1}{N'} \sum_{j=1}^{N'} \sum_{i=1}^N \gamma_{ij} c_i + \frac{1}{N'} \sum_{j=1}^{N'} \Delta c_j \quad (\text{A-2})$$

where  $e$  is assumed to have mean zero. Reversing the orders of the double sum terms and noting that  $w_i = \sum_{j=1}^{N'} \nu_{ij}$ , and  $s_i = \sum_{j=1}^{N'} \gamma_{ij}$ , we can rewrite eq. A-2 as,

$$\bar{p}' = \frac{1}{N'} \sum_{i=1}^N g_i w_i + \frac{1}{N'} \sum_{i=1}^N c_i s_i + \frac{1}{N'} \sum_{j=1}^{N'} \Delta g_j + \frac{1}{N'} \sum_{j=1}^{N'} \Delta c_j \quad (\text{A-3})$$

Using the definition of covariance ( $\text{cov}(x, y) = E[xy] - E[x]E[y]$ ) we can replace the first two terms on the RHS,

$$\bar{p}' = \frac{N}{N'} \text{cov}(w, g) + \frac{N}{N'} \text{cov}(s, c) + \langle \Delta g \rangle + \langle \Delta c \rangle + \frac{N}{N'} (\bar{w}\bar{g} + \bar{s}\bar{c}) \quad (\text{A-4})$$

623 The angle brackets here mean averages over the descendant population. Noting  
 624  $N\bar{w} = N\bar{s} = N'$  we can rewrite the final term on the RHS as  $\bar{g} + \bar{c}$ .<sup>1</sup> Subtracting the  
 625 mean phenotype in the ancestral population,  $\bar{p} = \bar{g} + \bar{c}$ , we have (3).

626 The cultural covariance term in (3) takes the ‘ancestral’ point of view, in that it in-  
 627 cludes ancestral cultural values and their fitnesses. However, we can re-express  
 628 this term from the descendant point of view with the following quick restatement,

$$\begin{aligned} \text{cov}(s, c) &= \overline{cs} - \bar{c}\bar{s} \\ &= \frac{1}{N} \sum_{i=1}^N \sum_{j=1}^{N'} c_i \gamma_{ij} - \bar{c}\bar{s} = \sum_{j=1}^{N'} \langle c_i \gamma_{ij} \rangle - \bar{c}\bar{s} \\ &= \sum_{j=1}^{N'} \text{cov}(c_i, \gamma_{ij}) + \sum_{j=1}^{N'} \bar{c} \bar{\gamma}_j - \bar{c}\bar{s} \\ &= \sum_{j=1}^{N'} \text{cov}(\gamma_{ij}, c_i) + \bar{c} \frac{N'}{N} - \bar{c}\bar{s} \\ &= N' \langle \text{cov}(\gamma_{ij}, c_i) \rangle \end{aligned} \tag{A-5}$$

629 Where the final mean is taken over the descendant population.

## 630 A-2 Derivation of Gene-culture Hamilton’s rule

631 We begin with the following cultural and genetic fitness functions:

$$s_i = s_0 + \beta_{sp} p_i + \beta_{s\tilde{p}} \tilde{p} = s_0 + \beta_{sp} c_i + \beta_{sp} g_i + \beta_{s\tilde{p}} \tilde{c}_i + \beta_{s\tilde{p}} \tilde{g}_i \tag{A-6}$$

$$w_i = w_0 + \beta_{wp} p_i + \beta_{w\tilde{p}} \tilde{p} = w_0 + \beta_{wp} c_i + \beta_{wp} g_i + \beta_{w\tilde{p}} \tilde{c}_i + \beta_{w\tilde{p}} \tilde{g}_i \tag{A-7}$$

---

<sup>1</sup>In this derivation we assume that for every descendant  $j$  there exists some ancestor  $i$  for whom  $\gamma_{ij} > 0$ .

632 The tilde over a variable indicates the mean value of that variable across  $i$ 's neigh-  
 633 bors. We have assumed both kinds of fitness are linear functions of an individuals  
 634 own phenotype and the phenotypes of her neighbors. As in the standard derivation  
 635 of Hamilton's rule using the Price equation, it is customary to identify  $\beta_{wp}$  and  $\beta_{w\tilde{p}}$   
 636 as the cost ( $C$ ) to an altruist and benefit ( $B$ ) to recipients of altruism, respectively.  
 637 We will use the same convention, but add subscripts to indicate costs and benefits  
 638 to genetic *and* cultural fitnesses"

$$\begin{aligned}\beta_{wp} &\Rightarrow C_g \\ \beta_{sp} &\Rightarrow C_c \\ 639 \quad \beta_{w\tilde{p}} &\Rightarrow B_g \\ \beta_{s\tilde{p}} &\Rightarrow B_c\end{aligned}$$

Substituting A-7 into our Price equation in 3, though ignoring the transmission terms, we have,

$$\begin{aligned}\bar{w}\Delta\bar{p} = & B_c [\text{cov}(\tilde{c}, c) + \text{cov}(\tilde{g}, c)] + C_c [\text{var}(c) + \text{cov}(g, c)] \\ & + B_g [\text{cov}(\tilde{c}, g) + \text{cov}(\tilde{g}, g)] + C_g [\text{cov}(c, g) + \text{var}(g)] \quad (\text{A-8})\end{aligned}$$

640 The equation above allows us to derive a condition for the evolution of the altru-  
 641 istic trait  $p$  in the population. Using  $\text{cov}(x, y) = \beta_{xy}\text{var}(y)$ , where  $\beta_{xy}$  is the linear  
 642 regression coefficient of  $x$  on  $y$ , and dividing through by  $\text{var}(c)$ , we can rearrange  
 643 the above expression to find,

$$B_c(\beta_{\tilde{c}c} + \beta_{\tilde{g}c}) > -C_c(1 + \beta_{gc}) - \{C_g(1 + \beta_{cg}) + B_g(\beta_{\tilde{c}g} + \beta_{\tilde{g}g})\} \frac{\text{var}(g)}{\text{var}(c)}. \quad (\text{A-9})$$

# Supplementary Information

## SI-1 Model I

We imagine a population of haploid individuals who, once born, select a cultural parent to copy. Each individual has two loci with a single allele present at each. The allele at the first locus is genetically transmitted while the allele at the second is received from a cultural parent. Individuals interact assortatively, with some probability of being genetically identical due to assortment,  $(f_g)$ , and culturally identical due to assortment,  $(f_c)$ . At discrete time steps individuals meet a random kin member and play a prisoner's dilemma according to a mixed strategy. The phenotype,  $p$ , is the probability of playing cooperate. The two loci mean four types of individuals  $\{0, 0\}, \{0, 1\}, \{1, 0\}, \{1, 1\}$ , with phenotypes,  $p_{00} = 0, p_{01} = 1/2, p_{10} = 1/2, p_{11} = 1$ .

The expected reproductive fitnesses for each type are

$$w_{00} = w_0 + B_g(P(11|00) + P(01|00)/2 + P(10|00)/2)$$

$$w_{01} = w_0 + B_g(P(11|01) + P(01|01)/2 + P(10|01)/2) - C_g/2$$

$$w_{10} = w_0 + B_g(P(11|10) + P(01|10)/2 + P(10|10)/2) - C_g/2$$

$$w_{11} = w_0 + B_g(P(11|11) + P(01|11)/2 + P(10|11)/2) - C_g.$$

The conditional probabilities are probability of encountering a certain type given one's own type. For example,  $P(10|00)$  should be read as the "probability of encountering a  $\{1, 0\}$  given that the player is a  $\{0, 0\}$ ." Rather than enumerate all of these

658 conditional probabilities we take advantage of the following identity:

$$P(g_o, c_o | g_p, c_p) = P(g_o | g_p) P(c_o | c_p) , \quad (\text{SI-1})$$

where the  $o$  subscript indicates the opponent and  $p$  the player. We need only specify the following conditional probabilities,

$$P(g_o = 1 | g_p = 1) = (1 - f_g)q_g + f_g \quad (\text{SI-2})$$

$$P(g_o = 1 | g_p = 0) = (1 - f_g)q_g \quad (\text{SI-3})$$

$$P(c_o = 1 | c_p = 1) = (1 - f_c)q_c + f_c \quad (\text{SI-4})$$

$$P(c_o = 1 | c_p = 0) = (1 - f_c)q_c . \quad (\text{SI-5})$$

659 Note that the remaining marginal conditional probabilities are given by

$$P(g_o = 0 | g_p = 0) = 1 - P(g_o = 1 | g_p = 0) \quad (\text{SI-6})$$

$$P(g_o = 0 | g_p = 1) = 1 - P(g_o = 1 | g_p = 1) \quad (\text{SI-7})$$

$$P(c_o = 0 | c_p = 0) = 1 - P(c_o = 1 | c_p = 0) \quad (\text{SI-8})$$

$$P(c_o = 0 | c_p = 1) = 1 - P(c_o = 1 | c_p = 1) . \quad (\text{SI-9})$$

660 Using (SI-1) we can calculate all the conditional probabilities of encounters be-  
661 tween types.

662 To find the condition for the evolution of the altruistic phenotype, we need only  
663 substitute all the relevant terms in (9). As  $B_c = C_c = 0$ , we can remove those terms.

664 We then only have to calculate the following,

$$\beta_{cg}var(g) = 0 \quad (\text{SI-10})$$

$$var(g) = \frac{1}{4}q_c(1 - q_c) \quad (\text{SI-11})$$

$$\beta_{\tilde{g}g}var(g) = \frac{1}{4}f_gq_g(1 - q_g) \quad (\text{SI-12})$$

$$\beta_{\tilde{c}g}var(g) = 0 \quad (\text{SI-13})$$

665 Substituting these terms into (9) we arrive at 12.

## 666 SI-2 Model II

In this model, individuals encounter one another and play a prisoner's dilemma. This time, the game determines both the reproductive fitness and cultural fitness of the players. We imagine individuals producing 'cultural gametes', or behavioral tokens. The probability of acquiring a given cultural allele will be determined by the proportion that allele constitutes of all the available cultural gametes. The expected number of cultural gametes produced by individuals of each type are:

$$z_{00} = z_0 + B_c^z(P(11|00) + P(01|00)/2 + P(10|00)/2)$$

$$z_{01} = z_0 + B_c^z(P(11|01) + P(01|01)/2 + P(10|01)/2) - C_c^z/2$$

$$z_{10} = z_0 + B_c^z(P(11|10) + P(01|10)/2 + P(10|10)/2) - C_c^z/2$$

$$z_{11} = z_0 + B_c^z(P(11|11) + P(01|11)/2 + P(10|11)/2) - C_c^z.$$

667 It is important to note that the terms  $B_c^z$  and  $C_c^z$  are the gametic fitness benefit  
 668 and cost, as opposed to  $B_c$  and  $C_c$  that appear in (9). The cultural fitness of an  
 669 individual  $i$  is  $s_i = z_i \frac{\bar{w}}{\bar{z}}$ , which we can substitute into the cultural covariance term  
 670 from (2),

$$\frac{1}{\bar{w}} \text{cov}(s_i, c_i) = \frac{B_c^z}{\bar{z}} \text{cov}(z_i, c_i) \quad (\text{SI-14})$$

671 We can then rewrite (9) as,

$$B_c^z(\beta_{\tilde{c}c} + \beta_{\tilde{g}c}) - C_c^z(1 + \beta_{cg}) > -[B_g(\beta_{\tilde{c}g} + \beta_{\tilde{g}g}) - C_g(1 + \beta_{cg})] \frac{\text{var}(g)}{\text{var}(c)} \frac{\bar{z}}{\bar{w}} \quad (\text{SI-15})$$

672 Again, we compute the relevant terms:

$$\beta_{\tilde{c}c} = f_c \quad (\text{SI-16})$$

$$\beta_{\tilde{g}c} = 0 \quad (\text{SI-17})$$

$$\beta_{\tilde{c}g} = 0 \quad (\text{SI-18})$$

$$\beta_{\tilde{g}g} = f_g \quad (\text{SI-19})$$

$$\beta_{cg} = 0 \quad (\text{SI-20})$$

$$\text{var}(c) = \frac{1}{4}q_c(1 - q_c) \quad (\text{SI-21})$$

$$\text{var}(g) = \frac{1}{4}q_g(1 - q_g) . \quad (\text{SI-22})$$

673 Substituting these terms into (9) gives us (14).



## Non-additive phenotypes

We assume that all descendant individuals have a (potentially) unique function for mapping from heritable inputs to phenotype,  $p_j(f_j(c_1, \dots, c_N), h_j(g_1, \cdot, g_N))$ . Assuming that the change in phenotype is small over small fluctuations in heritable inputs (e.g. because we are considering small evolutionary time scales), we can take a first order Taylor approximation of a phenotype function around the point  $(\bar{c}, \dots, \bar{c}, \bar{g}, \dots, \bar{g}) = (\bar{\mathbf{c}}, \bar{\mathbf{g}})$ ,

$$p_j \approx p_j(\bar{\mathbf{c}}, \bar{\mathbf{g}}) + \sum_{i=1}^N \frac{\partial p_j}{\partial c_i} \bigg|_{(\bar{\mathbf{c}}, \bar{\mathbf{g}})} (c_i - \bar{c}) + \sum_{i=1}^N \frac{\partial p_j}{\partial g_i} \bigg|_{(\bar{\mathbf{c}}, \bar{\mathbf{g}})} (g_i - \bar{g}).$$

To obtain the Price equation, we can substitute the above expression into  $\Delta \bar{p} = \bar{p}' - \bar{p}$ ,

$$\Delta \bar{p} \approx \frac{1}{N'} \sum_{j=1}^{N'} p_j(\bar{\mathbf{c}}, \bar{\mathbf{g}}) + \frac{1}{N'} \sum_{j=1}^{N'} \sum_{i=1}^N c_i \frac{\partial p_j}{\partial c_i} \bigg|_{(\bar{\mathbf{c}}, \bar{\mathbf{g}})} + \frac{1}{N'} \sum_{j=1}^{N'} \sum_{i=1}^N g_i \frac{\partial p_j}{\partial g_i} \bigg|_{(\bar{\mathbf{c}}, \bar{\mathbf{g}})} \quad (\text{SI-23})$$

$$- \frac{\bar{c}}{N'} \sum_{j=1}^{N'} \sum_{i=1}^N \frac{\partial p_j}{\partial c_i} \bigg|_{(\bar{\mathbf{c}}, \bar{\mathbf{g}})} - \frac{\bar{g}}{N'} \sum_{j=1}^{N'} \sum_{i=1}^N \frac{\partial p_j}{\partial g_i} \bigg|_{(\bar{\mathbf{c}}, \bar{\mathbf{g}})} - \bar{p} \quad (\text{SI-24})$$

Switching the order of all the summations, and defining the quantities,  $\mathcal{S}_i = \sum_{j=1}^{N'} \frac{\partial p_j}{\partial c_i} \bigg|_{(\bar{\mathbf{c}}, \bar{\mathbf{g}})}$ ,

and  $W_i = \sum_{j=1}^{N'} \frac{\partial p_j}{\partial g_i} \bigg|_{(\bar{\mathbf{c}}, \bar{\mathbf{g}})}$ , we can write,

$$\Delta \bar{p} = \frac{N}{N'} [\text{cov}(\mathcal{S}_i, c_i) + \text{cov}(W_i, g_i) + \bar{c}\bar{\mathcal{S}} + \bar{g}\bar{W}] - \frac{N}{N'} \bar{c}\bar{\mathcal{S}} - \frac{N}{N'} \bar{g}\bar{W} \quad (\text{SI-25})$$

$$+ \frac{1}{N'} \sum_{j=1}^{N'} p_j(\bar{\mathbf{c}}, \bar{\mathbf{g}}) - \bar{p} \quad (\text{SI-26})$$

Cancelling terms we arrive at Eq. (SI-23).

679 If we continue our expansion of the phenotype function, we arrive at the follow-  
680 ing result,

$$\Delta\bar{p} = \frac{N}{N'} \text{cov}(\mathcal{S}_i, c_i) + \frac{N}{N'} \text{cov}(\mathcal{W}_i, g_i) + \frac{N}{N'} \text{cov}(\mathcal{I}_i, g_i) + \overline{p_j(\bar{\mathbf{c}}, \bar{\mathbf{g}})} - \bar{p} \quad (\text{SI-27})$$

681 where,

$$\begin{aligned} \mathcal{S}_i &= \sum_{j=1}^{N'} \left( \frac{\partial p_j}{\partial c_i} + \frac{1}{2} \sum_{k=1}^N \frac{\partial^2 p_j}{\partial c_i \partial c_k} (c_k - \bar{c}) + \frac{1}{3!} \sum_{k=1}^N \sum_{l=1}^N \frac{\partial^3 p_j}{\partial c_i \partial c_k \partial c_l} (c_k - \bar{c})(c_l - \bar{c}) + \dots \right) \\ \mathcal{W}_i &= \sum_{j=1}^{N'} \left( \frac{\partial p_j}{\partial g_i} + \frac{1}{2} \sum_{k=1}^N \frac{\partial^2 p_j}{\partial g_i \partial g_k} (g_k - \bar{g}) + \frac{1}{3!} \sum_{k=1}^N \sum_{l=1}^N \frac{\partial^3 p_j}{\partial g_i \partial g_k \partial g_l} (g_k - \bar{g})(g_l - \bar{g}) + \dots \right) \\ \mathcal{I}_i &= \sum_{j=1}^{N'} \left( \frac{1}{2} \sum_{k=1}^N \frac{\partial^2 p_j}{\partial g_i \partial c_k} (c_k - \bar{c}) + \frac{1}{3!} \sum_{k=1}^N \sum_{l=1}^N \frac{\partial^3 p_j}{\partial g_i \partial c_k \partial c_l} (c_k - \bar{c})(c_l - \bar{c}) \right. \\ &\quad \left. + \frac{1}{3!} \sum_{k=1}^N \sum_{l=1}^N \frac{\partial^3 p_j}{\partial g_i \partial c_k \partial g_l} (c_k - \bar{c})(g_l - \bar{g}) + \dots \right). \end{aligned}$$

682 The dots represent higher order terms in the expansion. The  $\mathcal{S}_i$  and  $\mathcal{W}_i$  terms are ex-  
683 clusive to the cultural and genetic domains, while the  $\mathcal{I}_i$  term captures interactions  
684 between the two forms of inheritance. The additional covariance term captures the  
685 effect of interactions between genes and culture. In expanding these phenotype  
686 functions in a Taylor series, we've been able to directly relate the concepts of fitness  
687 to phenotype while making only minimal assumptions about either.
